# Supplementary material for: A supramolecular tranexamic acid with enhanced permeability and bioactivity
Source: Royal Society of Chemistry journal article supplement (doi:10.1039/d4tb02781g), 2025-01-01
Supplement: d4tb02781g1.pdf [file d4tb02781g1.pdf]

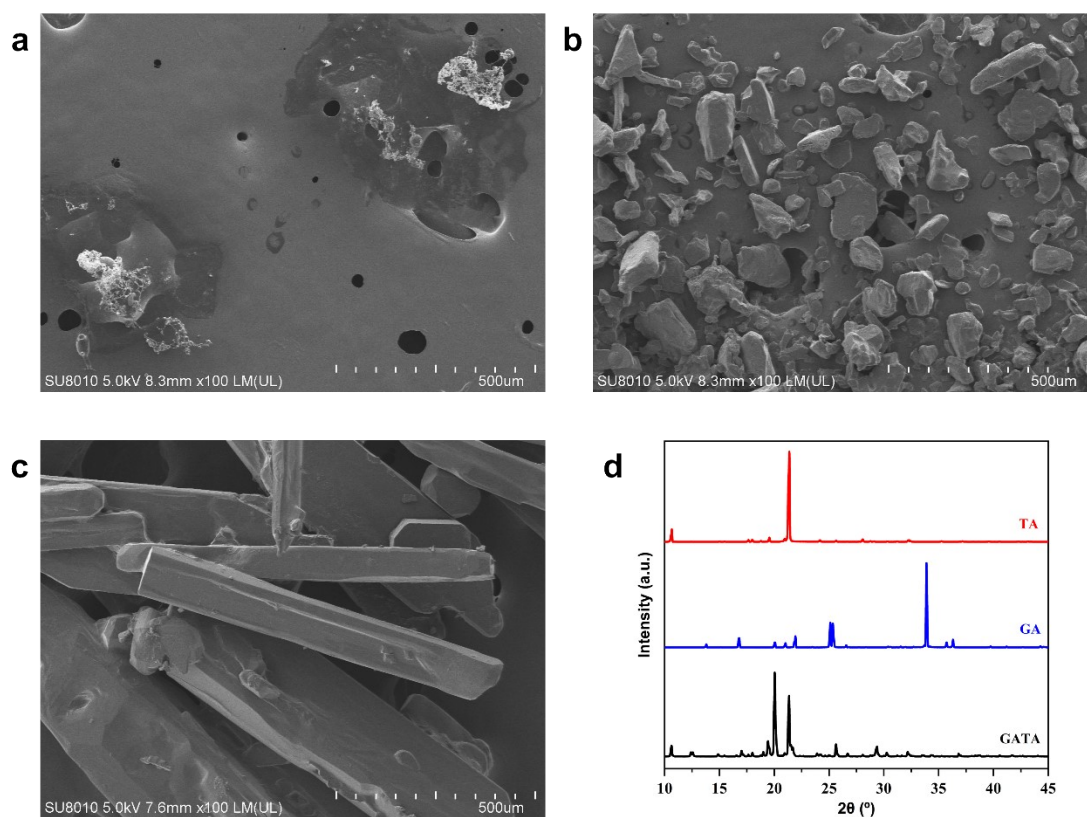

**Figure S1.** Microstructure of GA, TA, and GATA. (a) Scanning electron microscopy (SEM) image of GA; (b) SEM image of TA; (c) SEM image of GATA; (d) XRD patterns of GA, TA, and GATA.

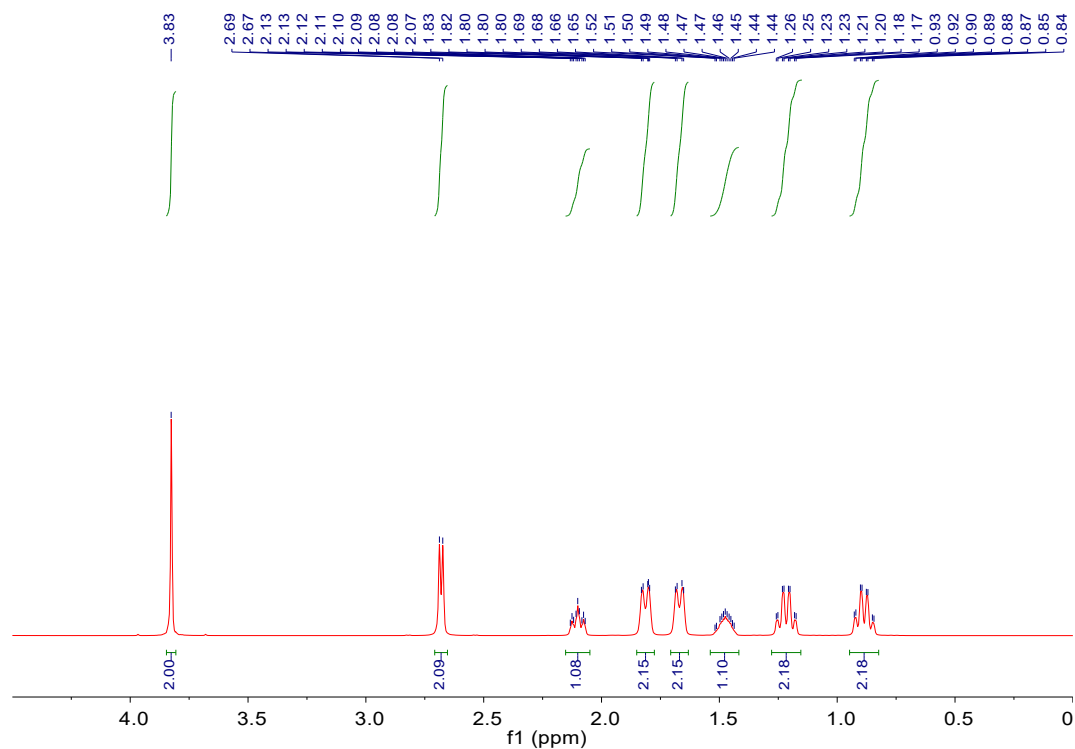

**Figure S2.** <sup>1</sup>H NMR of GATA. <sup>1</sup>H NMR (500 MHz, D<sub>2</sub>O) δ 3.83(s, 2H), 2.68 (dd, J = 10Hz, 2H), 2.10 (t, 15Hz, 1H), 1.83–1.80 (m, 1H), 1.69–1.65 (m, 1H), 1.47 (s, 1H), 1.23–1.20 (dd, J = 5, 5Hz, 2H), 0.90–0.87 (dd, J = 5, 5 Hz, 1H).

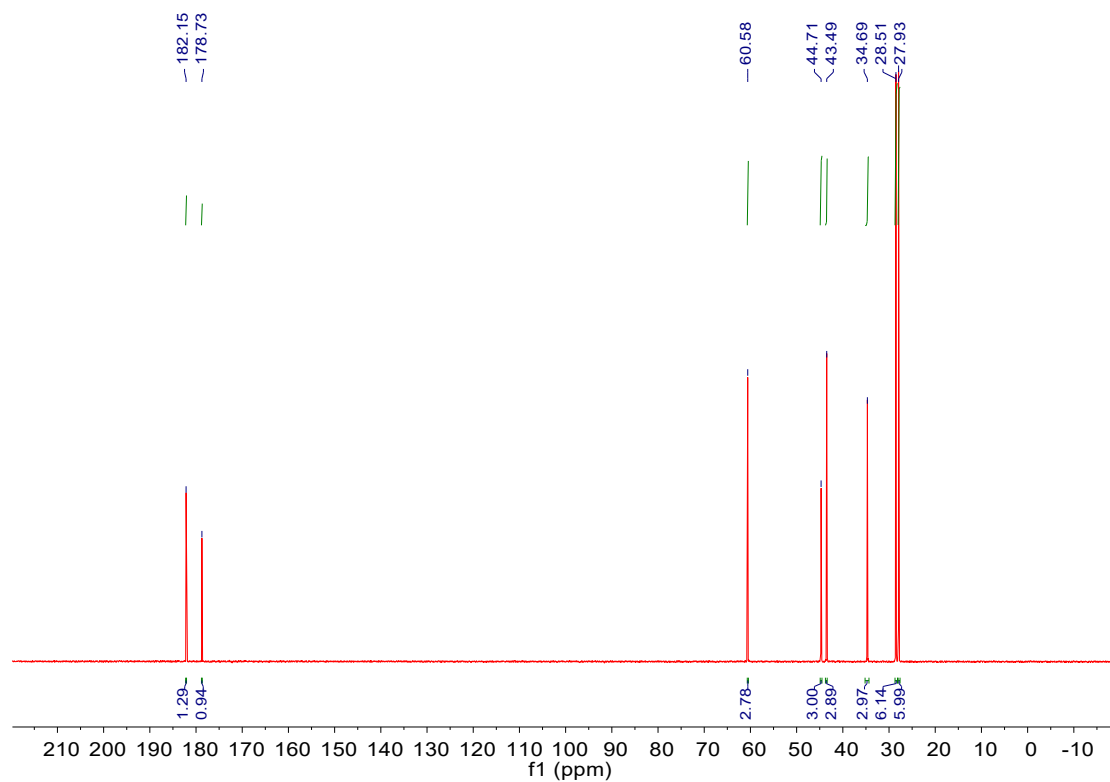

**Figure S3.**  $^{13}\text{C}$  NMR of GATA.  $^{13}\text{C}$  NMR (500 MHz,  $\text{D}_2\text{O}$ )  $\delta$  182.15 (s), 178.73 (s), 60.58 (s), 44.71 (s), 43.49 (s), 34.69 (s), 28.51 (s).

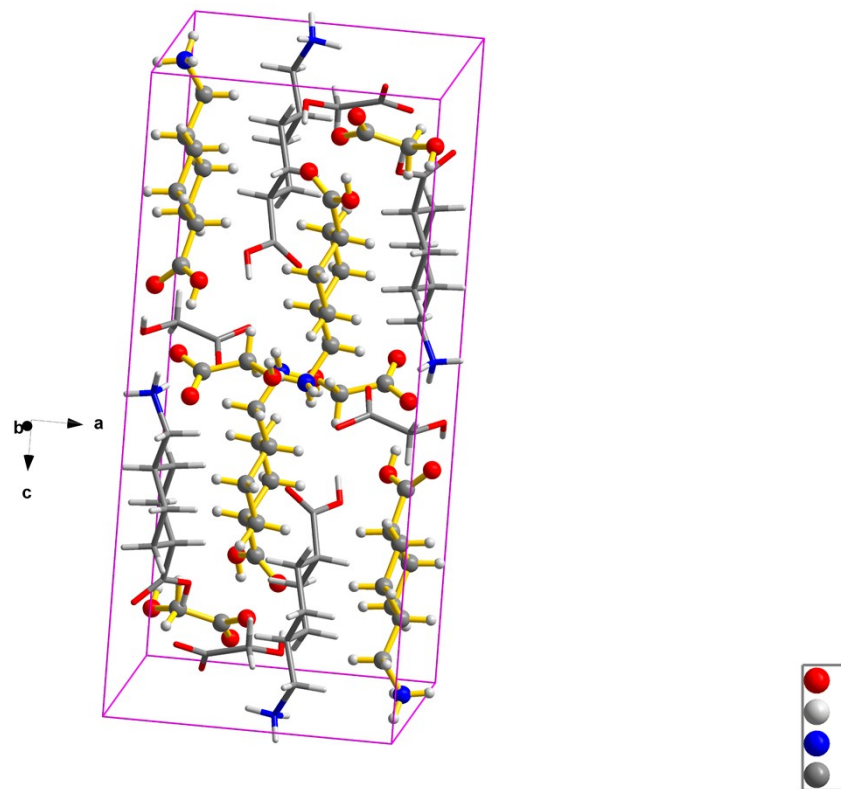

**Figure S4.** Crystal cell of GATA

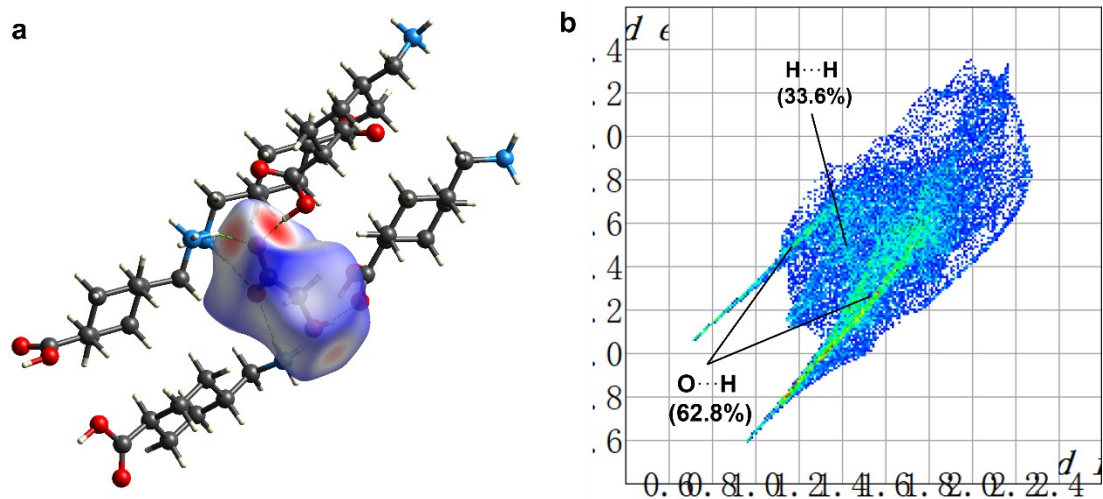

**Figure S5.** (a) 3D Hirshfeld  $d_{\text{norm}}$  surface of GA anion. (b) 2D fingerprint plot of GA anion with atom-atom contact contributions.

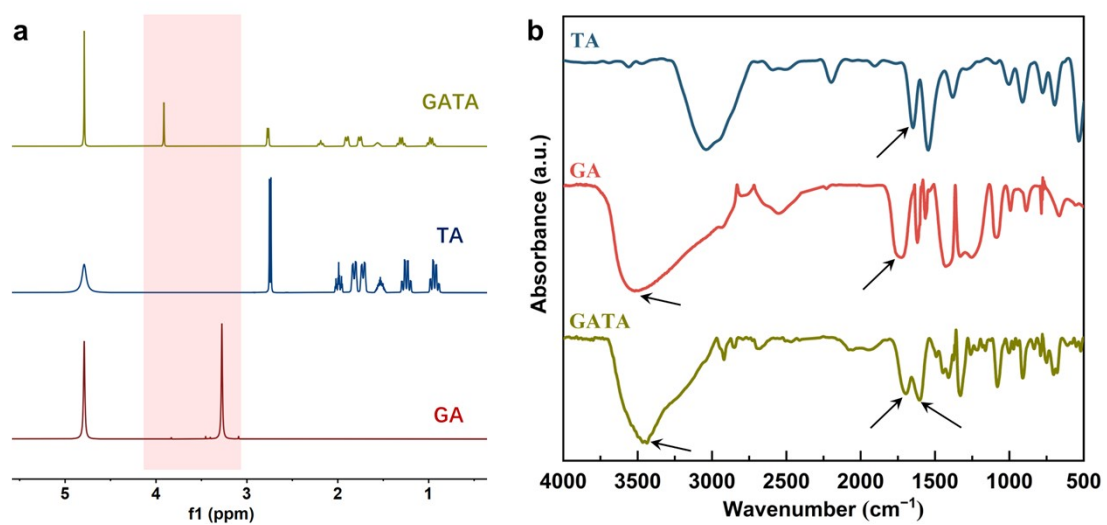

**Figure S6.** (a) <sup>1</sup>H NMR and (b) FTIR spectra of GA, TA, and GATA.

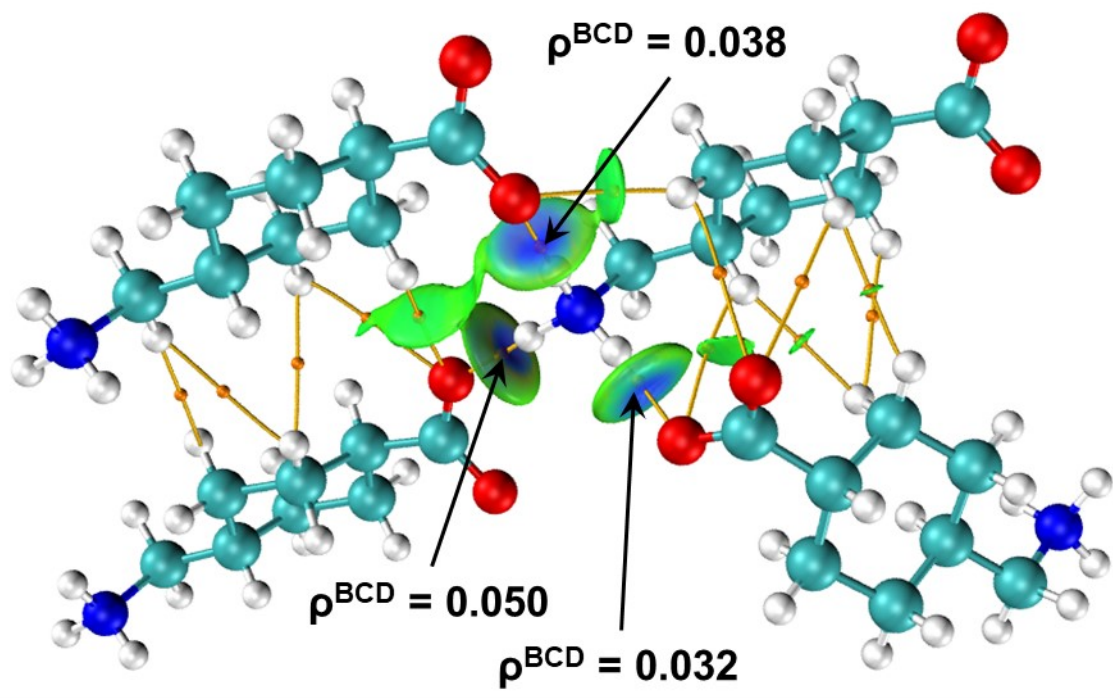

**Figure S7.** IGMH and AIM analysis of TA.

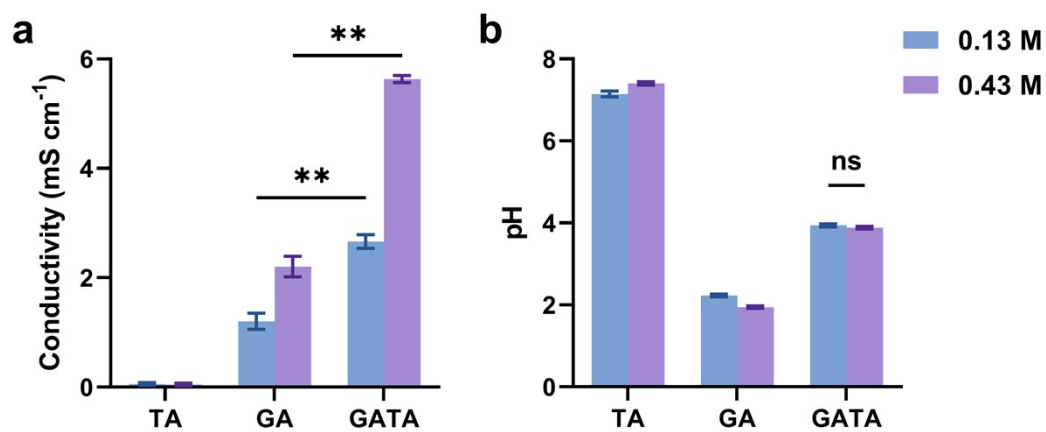

**Figure S8.** (a) Conductivity and (b) pH of GA, TA, or GATA solutions at different concentrations. Results are the mean  $\pm$  SD for  $n = 3$ ; ns = no significant,  $**p < 0.01$ .



**Table S1.** Crystal data and structure refinement

| Compound                                  | GATA                                              |
|-------------------------------------------|---------------------------------------------------|
| CCDC                                      | 2410510                                           |
| Empirical formula                         | C <sub>10</sub> H <sub>19</sub> NO <sub>5</sub>   |
| Formula weight                            | 233.26                                            |
| Temperature/K                             | 169.99(10)                                        |
| Crystal system                            | orthorhombic                                      |
| Space group                               | Pbca                                              |
| a/Å                                       | 9.4867(3)                                         |
| b/Å                                       | 11.8536(3)                                        |
| c/Å                                       | 21.3590(7)                                        |
| $\alpha$ /°                               | 90                                                |
| $\beta$ /°                                | 90                                                |
| $\gamma$ /°                               | 90                                                |
| Volume/Å <sup>3</sup>                     | 2401.85(13)                                       |
| Z                                         | 8                                                 |
| $\rho_{\text{calc}}$ /cm <sup>3</sup>     | 1.290                                             |
| $\mu$ /mm <sup>-1</sup>                   | 0.867                                             |
| F(000)                                    | 1008.0                                            |
| Crystal size/mm <sup>3</sup>              | 0.12 × 0.11 × 0.09                                |
| Radiation                                 | Cu K $\alpha$ ( $\lambda$ = 1.54184)              |
| 2 $\theta$ range for data collection/°    | 8.28 to 146.754                                   |
| Index ranges                              | -11 ≤ h ≤ 10, -12 ≤ k ≤ 14, -19 ≤ l ≤ 26          |
| Reflections collected                     | 5723                                              |
| Independent reflections                   | 2365 [Rint = 0.0219, Rsigma = 0.0247]             |
| Data/restraints/parameters                | 2365/0/148                                        |
| Goodness-of-fit on F <sup>2</sup>         | 1.048                                             |
| Final R indexes [I ≥ 2 $\sigma$ (I)]      | R <sub>1</sub> = 0.0429, wR <sub>2</sub> = 0.1126 |
| Final R indexes [all data]                | R <sub>1</sub> = 0.0482, wR <sub>2</sub> = 0.1167 |
| Largest diff. peak/hole/e Å <sup>-3</sup> | 0.20/-0.24                                        |

**Table S2.** Fractional atomic coordinates ( $\times 10^4$ ) and equivalent isotropic displacement parameters ( $\text{\AA}^2 \times 10^3$ ) for GATA.

| Atom | x          | y          | z         | U(eq)   |
|------|------------|------------|-----------|---------|
| O1   | 2048.5(16) | 5892.9(13) | 8230.4(6) | 54.8(4) |
| O2   | 382.6(14)  | 7117.0(11) | 8484.2(6) | 47.3(3) |
| N1   | 669.2(13)  | 8351.7(11) | 5103.6(6) | 28.5(3) |
| C1   | 1276.1(17) | 6787.1(14) | 8121.4(8) | 33.1(4) |
| C2   | 1601.5(16) | 7315.8(13) | 7495.7(8) | 32.2(4) |
| C3   | 1100(2)    | 8534.9(14) | 7448.3(8) | 41.9(4) |
| C4   | 1482(2)    | 9025.3(14) | 6810.5(8) | 40.4(4) |
| C5   | 900.6(15)  | 8327.0(12) | 6271.2(7) | 28.1(3) |
| C6   | 1381.9(17) | 7099.8(13) | 6327.7(7) | 30.7(3) |
| C7   | 976.4(17)  | 6604.9(12) | 6964.5(7) | 30.8(3) |
| C8   | 1348.5(15) | 8875.7(13) | 5659.7(7) | 30.7(3) |
| O3   | 1658.6(10) | 4955.7(8)  | 9289.2(5) | 28.0(3) |
| O4   | 2381.9(11) | 3402.8(9)  | 9775.9(5) | 31.7(3) |
| O5   | 5115.9(11) | 3728.1(11) | 9396.2(6) | 39.9(3) |
| C9   | 2609.0(14) | 4261.6(12) | 9462.5(6) | 23.1(3) |
| C10  | 4104.3(15) | 4570.0(14) | 9272.2(7) | 32.1(4) |

U(eq) is defined as 1/3 of the trace of the orthogonalized UIJ tensor

**Table S3.** Anisotropic displacement parameters ( $\text{\AA}^2 \times 10^3$ ) for GATA

| Atom | U <sub>11</sub> | U <sub>22</sub> | U <sub>33</sub> | U <sub>23</sub> | U <sub>13</sub> | U <sub>12</sub> |
|------|-----------------|-----------------|-----------------|-----------------|-----------------|-----------------|
| O1   | 60.2(9)         | 66.1(9)         | 38.1(6)         | 20.0(6)         | 15.2(6)         | 31.9(7)         |
| O2   | 46.4(7)         | 42.1(7)         | 53.4(7)         | -0.5(6)         | 14.4(6)         | 6.1(6)          |
| N1   | 24.1(6)         | 26.2(6)         | 35.2(6)         | 5.7(5)          | 5.6(5)          | 3.4(5)          |
| C1   | 30.6(8)         | 33.1(8)         | 35.5(8)         | -1.9(7)         | -3.1(7)         | 0.4(6)          |
| C2   | 28.3(8)         | 32.6(8)         | 35.7(8)         | 3.4(7)          | -3.8(6)         | 0.3(6)          |
| C3   | 58.2(11)        | 27.4(9)         | 40.1(9)         | -6.9(7)         | -7.2(8)         | -2.4(8)         |
| C4   | 50.7(10)        | 24.2(8)         | 46.5(10)        | 0.1(7)          | -7.7(8)         | -6.6(7)         |
| C5   | 22.4(7)         | 25.8(7)         | 36.2(8)         | 3.0(6)          | -1.9(6)         | -0.4(6)         |
| C6   | 32.9(8)         | 23.9(8)         | 35.4(8)         | 1.1(6)          | 1.4(6)          | 1.4(6)          |
| C7   | 35.1(8)         | 20.2(7)         | 37.0(8)         | 1.0(6)          | 2.0(7)          | 1.3(6)          |
| C8   | 21.0(7)         | 27.3(8)         | 43.9(9)         | 7.3(7)          | -1.4(6)         | -2.2(6)         |
| O3   | 27.2(5)         | 27.9(6)         | 28.8(5)         | 1.5(4)          | 0.4(4)          | 3.3(4)          |
| O4   | 23.5(5)         | 30.4(6)         | 41.4(6)         | 9.2(5)          | 3.4(4)          | 1.9(4)          |
| O5   | 20.8(5)         | 50.4(7)         | 48.5(7)         | -6.3(6)         | -1.8(5)         | 2.0(5)          |
| C9   | 22.6(7)         | 25.2(7)         | 21.4(6)         | -4.3(5)         | -0.1(5)         | -0.4(5)         |
| C10  | 23.3(7)         | 37.8(9)         | 35.2(8)         | 2.2(7)          | -0.7(6)         | -5.5(6)         |

The anisotropic displacement factor exponent takes the form: -  
 $2\pi^2[h2a*2U_{11}+2hka*b*U_{12}+...]$

**Table S4.** Bond lengths in GATA

| Bond  | Length/Å | Bond   | Length/Å   |
|-------|----------|--------|------------|
| O1–C1 | 1.309(2) | C5–C6  | 1.529(2)   |
| O2–C1 | 1.213(2) | C5–C8  | 1.520(2)   |
| N1–C8 | 1.487(2) | C6–C7  | 1.530(2)   |
| C1–C2 | 1.508(2) | O3–C9  | 1.2755(17) |
| C2–C3 | 1.525(2) | O4–C9  | 1.2372(17) |
| C2–C7 | 1.533(2) | O5–C10 | 1.4097(19) |
| C3–C4 | 1.525(2) | C9–C10 | 1.5203(19) |
| C4–C5 | 1.522(2) |        |            |

**Table S5.** Bond angles in GATA

| Bond     | Angle/°    | Bond      | Angle/°    |
|----------|------------|-----------|------------|
| O1–C1–C2 | 112.30(14) | C4–C5–C8  | 108.45(13) |
| O2–C1–O1 | 122.57(16) | C8–C5–C6  | 113.04(13) |
| O2–C1–C2 | 125.11(15) | C5–C6–C7  | 111.08(13) |
| C1–C2–C3 | 112.88(14) | C2–C7–C6  | 110.48(13) |
| C1–C2–C7 | 110.39(13) | N1–C8–C5  | 112.74(12) |
| C3–C2–C7 | 110.57(13) | O3–C9–C10 | 115.26(12) |
| C2–C3–C4 | 110.29(15) | O4–C9–O3  | 124.39(13) |
| C5–C4–C3 | 112.52(14) | O4–C9–C10 | 120.33(13) |
| C4–C5–C6 | 110.46(13) | O5–C10–C9 | 114.50(13) |

**Table S6.** Torsion angles in GATA

| Bond        | Angle/°     | Bond         | Angle/°     |
|-------------|-------------|--------------|-------------|
| O1–C1–C2–C3 | -161.01(15) | C3–C4–C5–C8  | -179.41(14) |
| O1–C1–C2–C3 | 74.68(18)   | C4–C5–C6–C7  | 55.21(17)   |
| O2–C1–C2–C3 | 20.8(2)     | C4–C5–C8–N1  | -171.97(13) |
| O2–C1–C2–C7 | -103.53(19) | C5–C6–C7–C2  | -57.09(17)  |
| C1–C2–C3–C4 | 179.06(14)  | C6–C5–C8–N1  | 65.19(16)   |
| C1–C2–C7–C6 | -176.53(13) | C7–C2–C3–C4  | -56.73(19)  |
| C2–C3–C4–C5 | 56.0(2)     | C8–C5–C6–C7  | 176.92(13)  |
| C3–C2–C7–C6 | 57.84(18)   | O3–C9–C10–O5 | -172.27(12) |
| C3–C4–C5–C6 | -55.02(19)  | O4–C9–C10–O5 | 9.3(2)      |

**Table S7.** Hydrogen atom coordinates ( $\text{\AA} \times 10^4$ ) and isotropic displacement parameters ( $\text{\AA}^2 \times 10^3$ ) of GATA

| <b>Atom</b> | <b>x</b> | <b>y</b> | <b>z</b> | <b>U(eq)</b> |
|-------------|----------|----------|----------|--------------|
| H1          | 1876.92  | 5652.42  | 5652.42  | 82           |
| H1A         | 834.71   | 8774.31  | 8774.31  | 34           |
| H1B         | -256.11  | 8302.72  | 8302.72  | 34           |
| H1C         | 1022.34  | 7664.42  | 7664.42  | 34           |
| H2          | 2628.12  | 7315.99  | 7315.99  | 39           |
| H3A         | 1537.2   | 8980.89  | 8980.89  | 50           |
| H3B         | 86.94    | 8565.01  | 8565.01  | 50           |
| H4A         | 1113.72  | 9787.01  | 9787.01  | 49           |
| H4B         | 2499.56  | 9066.43  | 9066.43  | 49           |
| H5          | -130.92  | 8343.62  | 8343.62  | 34           |
| H6A         | 2396.56  | 7060.93  | 7060.93  | 37           |
| H6B         | 951.14   | 6656.23  | 6656.23  | 37           |
| H7A         | -42.07   | 6586.46  | 6586.46  | 37           |
| H7B         | 1322.98  | 5836.98  | 5836.98  | 37           |
| H8A         | 1108.53  | 9670.83  | 9670.83  | 37           |
| H8B         | 2363.97  | 8816.6   | 8816.6   | 37           |
| H5A         | 5045.28  | 3223.32  | 3223.32  | 60           |
| H10A        | 4114.46  | 4734.46  | 4734.46  | 39           |
| H10B        | 4375.77  | 5253.12  | 5253.12  | 39           |
